## **Independent mechanisms of temporal and linguistic cue correspondence benefiting audiovisual speech processing**

Sara Fiscella,<sup>1,2</sup> Madeline S Cappelloni,<sup>2,3</sup> Ross K Maddox,<sup>2,3,4,5</sup>

<sup>1</sup> *Brain and Cognitive Sciences, University of Rochester, Rochester, NY 14627, USA*

<sup>2</sup> *Del Monte Institute for Neuroscience, University of Rochester, Rochester, NY 14627, USA*

<sup>3</sup> *Biomedical Engineering, University of Rochester, Rochester, NY 14627, USA*

<sup>4</sup> *Neuroscience, University of Rochester, Rochester, NY 14627, USA*

<sup>5</sup> *Center for Visual Science, University of Rochester, Rochester, NY 14627, USA*

## **ABSTRACT**

When listening is difficult, seeing the face of the talker aids speech comprehension. Faces carry both temporal (low-level physical correspondence of mouth movement and auditory speech) and linguistic (learned physical correspondences of mouth shape (viseme) and speech sound (phoneme)) cues. Listeners participated in two experiments investigating how these cues may be used to process sentences when maskers are present. In Experiment I, faces were rotated to disrupt linguistic but not temporal cue correspondence. Listeners suffered a deficit in speech comprehension when the faces were rotated, indicating that visemes are processed in a rotation-dependent manner, and that linguistic cues aid comprehension. In Experiment II, listeners were asked to detect pitch modulation in the target speech with upright and inverted faces that either matched the target or masker speech such that performance differences could be explained by binding, an early multisensory integration mechanism distinct from traditional late integration. Performance in this task replicated previous findings that temporal integration induces binding, but there was no behavioral evidence for a role of linguistic cues in binding. Together these experiments point to temporal cues providing a speech processing benefit through binding and linguistic cues providing a benefit through late integration.

## 1 I. INTRODUCTION

2 While having a conversation may be easy in quiet environments, noisy environments can render  
3 listening a challenging task. Though many of us can listen to our conversation partner with minimal  
4 conscious effort, the neural processes by which we accomplish this auditory feat are complex, rely  
5 on many stimulus cues, and are poorly understood.

6 When auditory information is insufficient or difficult to process, visual cues help us listen.  
7 Seeing the face of a talker greatly improves our ability to comprehend their speech (Arnold and Hill,  
8 2001; Reisberg et al., 1987). Speaking faces carry both temporal and linguistic cues that are  
9 congruent with auditory speech. Specifically, the movements of the talker’s mouth and surrounding  
10 areas are temporally coherent with the unique amplitude envelope of the auditory stream of interest,  
11 and the shapes the mouth makes are linguistically congruent with the speech sounds produced.  
12 Temporal information is an inherently physical cue and constrained by the dynamics of speech  
13 production. The time correlation of mouth movements and speech can help listeners pair the  
14 relevant auditory and visual streams (Maddox et al., 2015) or even reduce masking effects of  
15 competing auditory streams (Grant and Bernstein, 2019). Linguistic information is provided by the  
16 link between specific mouth shapes, called visemes, and the phonemes that they generate. Unlike  
17 pure temporal coherence, the link between visemes and phonemes is a learned prior that relies on a  
18 listener’s experience with language. The underlying mechanisms that may allow multisensory  
19 linguistic information to help us listen are not known.

20 Many researchers have turned to the McGurk effect to demonstrate the effect of visual linguistic  
21 cues on auditory perception. The McGurk effect occurs when observers are concurrently presented  
22 with an auditory syllable (e.g. “ba”) and a face which either matches the auditory syllable (e.g. “ba”) or a different syllable (e.g. “ga”). Even though subjects are presented with the same auditory syllable  
23 in both visual conditions they often report hearing a fused syllable (e.g. “da”) when the face and  
24

25 auditory speech do not match (McGurk and Macdonald, 1976). In order to better understand how  
26 the brain processes the linguistic cues associated with the face, studies have looked at the effects of  
27 inverting the face. These studies have found that when the face is inverted listeners less accurately  
28 identify syllables in the visual alone (“lipreading”) condition, and a higher proportion of people  
29 report hearing the auditory syllable than the fused syllable in a multisensory (McGurk) condition  
30 (Massaro and Cohen, 1996; Ujii et al., 2018). Despite the findings that inversion of the face can  
31 disrupt the processing that underlies the McGurk effect, the monosyllabic stimuli involved do not  
32 well model the demands of listening to speech in noise. It is still unclear whether these linguistic  
33 cues carry the same perceptual weight in continuous speech.

34       Though temporal and linguistic cues both can contribute to speech comprehension, they may  
35 contribute in very different ways or at different stages of the multisensory perception process.  
36 Multisensory integration has been traditionally thought of as a Bayesian combination of unisensory  
37 information just prior to perceptual decision making (“late integration”) (Körding et al., 2007), but  
38 recent work has pointed towards an earlier stage of multisensory integration known as “binding” or  
39 “early integration” (Atilgan et al., 2018; Bizley et al., 2016; Lee et al., 2019). Binding occurs when an  
40 auditory and visual stream are combined by the brain into a single perceptual object. Binding affects  
41 the encoding of an audiovisual object, whereas many of the effects of multisensory integration can  
42 be explained by a later decision bias (Bizley et al., 2016). When the brain forms a perceptual object, it  
43 can then allocate object-based attention (Shinn-Cunningham, 2008). By attending an object, all  
44 features are automatically enhanced, even orthogonal features that are not comodulated (Lee et al.,  
45 2019). This can both occur within a modality (i.e., multiple visual features combine to form a single  
46 visual object (Blaser et al., 2000)) or across modalities (i.e., a visual feature is bound with an auditory  
47 feature to form a multisensory object (Maddox et al., 2015)).

48 Despite potentially having independent neural underpinnings, studies often fail to distinguish  
49 between binding and late integration. Binding can be tested in a task that requires the listener to  
50 attend two streams to complete a dual task. If the stimuli in the two streams are bound, they can  
51 attend to the combined object and improve their performance instead of having to divide their  
52 attention to complete the task (Bizley et al., 2016). For binding to occur, there must be some  
53 compelling relationship between the object's features. Possible relationships between features, which  
54 may or may not contribute to binding, may roughly be divided into several categories: low-level  
55 physical correspondence, semantic congruence, and learned physical correspondence. Low-level  
56 physical correspondence involves fundamental relationships of stimuli such as temporal coherence,  
57 which is known to induce binding (Maddox et al., 2015), and spatial congruence. Semantic  
58 congruence encompasses higher-level learned relationships between stimuli that are commonly  
59 paired in the natural world, such as the image and sound of a dog barking, and are unlikely to induce  
60 binding due to the significant high-level processing required to make these associations. Learned  
61 physical relationships are similar to semantic congruence in the sense that they must be learned  
62 through observation of the natural world and similar to low-level physical correspondence in that  
63 the physical relationship of the stimuli is inherent to their production, such as visemes and  
64 phonemes in which mouth shapes are innately connected to the sounds they produce but are only  
65 known to be related by someone with experience of talkers. Here we investigate whether the learned  
66 physical relationships of natural speech induce binding.

67 In Experiment I, we sought to determine if rotating the face of a talker disrupts linguistic cues in  
68 a behaviorally relevant task and therefore provide some insight into how these cues contribute to  
69 listening in noisy environments. We engaged listeners in a speech in noise task with rotated videos  
70 of the target talker to determine how their performance was affected by disrupted cues. We found

71 that rotating the face hindered their speech comprehension, suggesting that the information carried  
72 by the face was indeed disrupted by the rotation.

73 We tested whether linguistic cues could induce binding in Experiment II. Given that the face  
74 inversion disrupted linguistic cues, we looked for differences in a multisensory selective attention  
75 task that might suggest differences in binding. Here we asked listeners to detect auditory pitch  
76 modulations and visual events in target stimuli while ignoring maskers. Binding is a likely mechanism  
77 to explain any improvement in performance when the listener saw the target's face relative to the  
78 masker's face. We found that although there was a clear advantage to seeing the target's face in all  
79 conditions, there was no effect of face rotation, suggesting that the disrupted linguistic cues did not  
80 impair binding.

81 We ultimately find that while linguistic cues are important for listening to speech in noisy  
82 environments, this is likely due to late integration rather than binding.

## 83 II. EXPERIMENT I

### 84 A. Methods

85 Participants performed a speech in noise comprehension task.

86 a. *Participants.* Fifteen participants (12 female, 3 male) age 18–26 (mean 22.6) had normal hearing  
87 (20 dB HL or better at octave frequencies from 500 Hz to 8000 Hz), self-reported normal or  
88 corrected-to-normal vision, and spoke English as their primary language. Participants gave  
89 written consent and were paid for their participation. All protocols were approved by the  
90 University of Rochester Research Subjects Review Board.

91 b. *Stimuli.* The visual and auditory stimuli were selected from the STeVi corpus. The corpus  
92 includes video recordings of four native English speakers (two male and two female) saying 200  
93 high probability sentences that contained three to five keywords each (e.g. “The scarf was made  
94 of shiny silk.”) (STeVi Speech Test Video Corpus, n.d.). We rotated the videos by  $0^\circ$ ,  $\pm 90^\circ$ , or  
95  $180^\circ$  in each trial. In some trials, still frames from the beginning of the unrotated videos were  
96 used instead of the dynamic faces. To ensure that all videos were the same size and aspect ratio,  
97 we drew a circle for each trial around the face of the speaker and its dark blue background,  
98 leaving the background outside of the circle black. In addition, the mouths of the talkers were  
99 centered on the screen (Figure 1). We used high probability sentences due to previous research  
100 showing a benefit of semantic context in understanding speech in noisy environments (Van  
101 Engen et al., 2014). Due to an error in the experiment code, the videos were played at 29.04  
102 frames per second (fps) instead of their native original 29.97 fps, which led to a small offset that  
103 increased throughout the trial with the biggest offset would be at the end of the longest  
104 sentence—a delay of 105 ms in the worst case. On average the delay was 37 ms, about one  
105 frame of video, and well within the audio-visual temporal binding window (Stevenson et al.,  
106 2012).

107 There were also two auditory masker streams comprised of natural speech from American  
108 English audiobooks, *The Alchemyst* (Scott, 2008) (male narrator) and *A Wrinkle in Time*  
109 (*L'Engle*, 2006) (female narrator). Audio was edited to remove silent pauses longer than 0.5  
110 seconds. The masker stimuli were each presented at 60 dB SPL. Then target stimuli were  
111 presented with a signal-to-noise ratio (SNR) of 0, -3, or -6 decibels (dB).

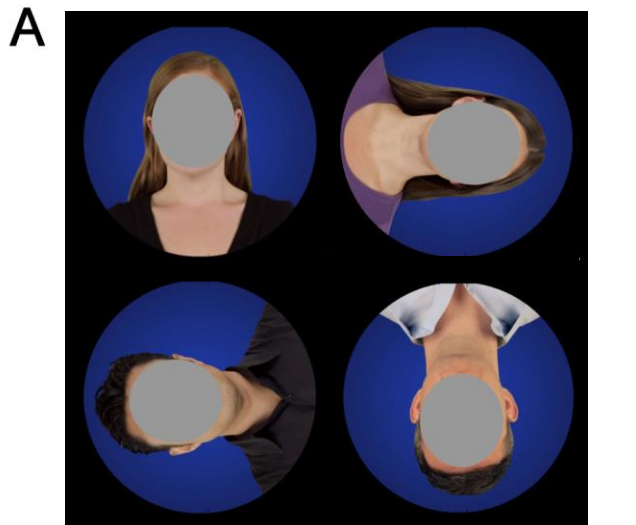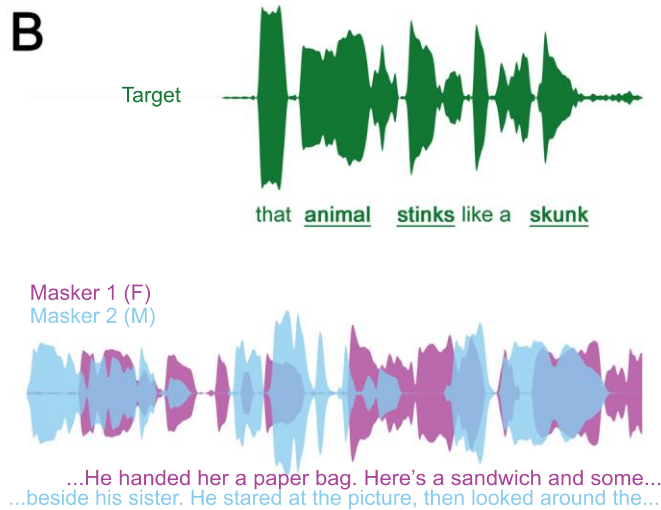

112



113 Figure 1: (Color Online). A. Images of the four talkers (faces covered to protect identity of the  
114 actors), with  $0^\circ$  (top left),  $+90^\circ$  (top right),  $-90^\circ$  (lower left), and  $180^\circ$  (lower right) rotation.  
115 The same circular mask is applied to all rotations with the mouth centered. B. Envelopes and  
116 transcription of auditory stimuli in a given trial. The target sentence began after a 2 second delay  
117 (top, green) while two maskers (bottom, female narrator: purple, male narrator: pale blue) played  
118 continuously throughout the trial. Subjects had to type each keyword (bold and underlined) in  
119 the target sentence while ignoring the maskers in order to receive credit.

120 c. *Procedure*. Subjects were seated in a dark soundproof booth in front of a 24 inch BenQ monitor,  
121 with their nose lined up approximately with the center of the screen and a 50 centimeter viewing  
122 distance. Sounds were presented via ER-2 insert earphones (Etymotic Research, Elk Grove  
123 Village, IL). Subjects were given a standard keyboard to type in their responses.

124 Subjects were required to pass a training module before beginning the experiment. Training  
125 began with two trials without maskers, followed by three trials of with maskers and an SNR of 0  
126 dB, and lastly three trials with SNR of  $-3$  dB. Participants responded by typing the sentence  
127 they heard after each trial with no capitalization or punctuation. For training, where accuracy  
128 needed to be judged in real time, responses in a given trial were scored as correct if the sequence  
129 of letters of the entered keywords were at least 80% correct. Subjects were given two chances to  
130 pass the training, which required correct responses in both of the trials without background  
131 noise and two out of the three of the trials with SNR of 0 dB. This served the dual purpose of  
132 ensuring that subjects could perform the task and familiarizing them with the talkers' faces and  
133 voices.

134 Subjects subsequently completed 192 trials. At 25, 50, and 75 percent completion they were  
135 given self-timed breaks with a minimum duration of 30 seconds. Each trial consisted of a video  
136 of a talker saying a unique high probability sentence with the two background auditory streams  
137 playing. No sentences were repeated. The trial began with a 2 second pause on the first frame of  
138 the video providing the subject some time to process which voice to listen to for that trial. There  
139 were 12 randomly interleaved conditions: three SNRs (0, -3, and -6 dB) and four visual  
140 conditions (rotation of 0°, ±90°, or 180°, and a static upright image). After the video played,  
141 subjects were instructed to type in what they heard with minimal spelling errors. They were also  
142 informed that they would receive partial credit and to give a best guess if they were not certain.

143 f. *Scoring.* The sentences from the STeVi corpus had three to five predetermined keywords per  
144 sentence. The percent of accurately entered keywords was hand scored based on Smayda et al's  
145 (2016) criteria. Responses were considered correct if the spelling errors did not change the  
146 meaning of the word or if the words were homophones.

147 g. *Statistics.* We fit the data to a linear mixed effects model considering both SNR and angle to be  
148 categorical variables (we did not expect a linear relationship, nor could we assume monotonicity,  
149 particularly with regards to angle). We also considered interactions of SNR and angle. Each  
150 subject was fit with an intercept.

151

## 152 B. Results

153 In the static condition, in which the face gives neither temporal nor linguistic information,  
154 subjects had near chance performance in the speech in noise task at negative signal to noise ratios  
155 (Figure 1A). Only at 0 dB SNR did subjects perform reliably above chance for the static face. Across  
156 SNRs, subjects were able to significantly improve their performance when the face was moving by  
157 7–47%, depending on the SNR and face rotation (Figure 1B). Across face rotation conditions these  
158 gains were largest at 0 dB SNR and decreased as SNR worsened. Within each SNR, improvements  
159 were largest for the upright face (0° rotation), and smallest for the inverted face (180° rotation).  
160 Averaging across SNRs to specifically investigate the effect of disrupted linguistic cues, there were  
161 significant differences in each subject's improvement depending on the rotation of the face. The  
162 mixed effects model showed that 0 dB and –3 dB conditions were significantly different  
163 ( $p=1.15 \times 10^{-10}$ ), but there was not a difference between –3 dB and –6 dB. The 0° and 180° rotations  
164 were significantly different ( $p=7.71 \times 10^{-3}$ ), as were the 90° and 180° rotations ( $p=0.0119$ ). The  
165 difference between 0° and 90° rotations approached, but did not reach, significance ( $p=0.0876$ ).  
166 There were no significant interaction terms.

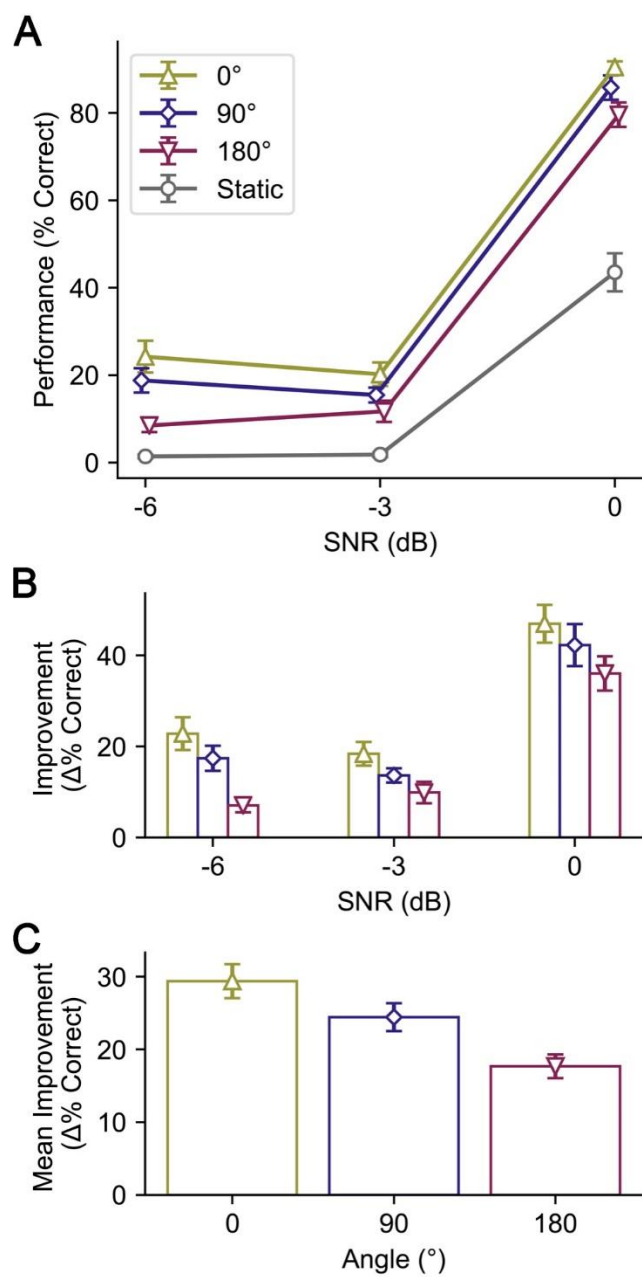

167

168 Figure 2: (Color Online). A. Performance in the speech in noise task averaged across subjects.  
169 Upward-facing triangle indicates the unrotated or upright face, diamond indicates rotation of  
170 the face by 90° to the left or right, downward-facing triangle indicated the inverted face,  
171 circle indicates a static image. B. The improvement in performance due to the moving face  
172 calculated as the difference in each video condition and the respective static face for a given  
173 SNR. C. Performance improvement due to temporal and linguistic cues averaged across  
174 SNR conditions. All error bars show  $\pm 1$  SEM.

175

### 176 C. Summary

177 In Experiment I we demonstrated that rotation of the head disrupted speech comprehension,  
178 suggesting orientation specific processing of the face. Given the significant reduction in speech  
179 processing between upright (0°) and inverted (180°) faces, we used these rotations to probe the  
180 question of whether binding is affected by linguistic cues in Experiment II.

## 181 III. EXPERIMENT II

### 182 A. Methods

183 We engaged participants in a fundamental frequency modulation discrimination task. Listeners  
184 were asked whether a target talker was modulated in pitch while ignoring masker talkers. They  
185 simultaneously performed a visual detection catch trial task to ensure visual attention was  
186 maintained throughout the experiment.

187 a. *Participants.* 23 participants (17 female, 6 male) ages 19–35 (mean 23.1) met the same criteria as  
188 the participants from Experiment I. Six of the participants had also participated in Experiment I  
189 and had similar performance to those who were naïve to the stimuli.

190 b. *Stimuli*. Target and masker high context sentences were selected from the STeVi corpus. The  
191 average duration of these sentences was 2.36 seconds with a standard deviation of 0.28 seconds.  
192 Each trial included two of these sentences (one target and one masker sentence). These voice  
193 pairings were evenly distributed across trials and always consisted of one male and one female  
194 talker. The sentence pairings were randomly chosen, with each target sentence presented twice,  
195 to have similar durations. All but nine sentence pairs had duration differences under 100 ms and  
196 the maximum duration difference was 274 ms.

197 For some trials the audio from the videos was pitch modulated. Pitch modulations were 10  
198 Hz cosine modulations with peak-to-peak amplitude of two semitones added to the stimulus'  
199 natural pitch trajectory using Praat (Boesma and Weenick, n.d.). Videos were presented upright  
200 or were inverted (rotated 180 degrees). The same audiobooks from Experiment I were played at  
201 -6 dB SPL to provide additional interfering speech noise and make the task appropriately  
202 challenging.

203 c. *Procedure*. Subjects were given three chances to pass a training module in which they had to detect  
204 pitch modulation when no maskers were present. As in Experiment I, this allowed subjects to  
205 learn the identities of the talkers. They were given ten practice trials and ten testing trials for  
206 which they had to achieve 70% accuracy to pass. The statistics of modulation were the same for  
207 both the training and the main experiment. Subjects were then shown two example trials to  
208 familiarize them with the complexity of the stimulus. They were instructed to look at the faces  
209 on the screen and perform two tasks simultaneously: the main pitch modulation discrimination  
210 task, and a catch trial visual detection task. Breaks were offered as in Experiment I.

211 d. *Main Task*. For each trial there was a target talker and masker talker. At the beginning of the trial,  
212 the subject saw an image of the target talker for 1.5 seconds, indicating which to listen to during  
213 the trial. After the image was presented, the video and four auditory streams were played: the  
214 target talker, the masker talker, and the two interfering audiobook background streams. Subjects  
215 reported whether the voice of the target talker contained the modulation by pressing a button.

216 This task consisted of 16 conditions (2 masker/target video  $\times$  2 face rotations  $\times$  4  
217 masker/target modulations). The video of a talker either matched the target or the masker  
218 auditory stream, the face of the talker was upright or inverted, and both, neither, only the target,  
219 or only the masker auditory streams were modulated. The subjects heard each of the 200 high  
220 probability sentences twice as a target, for a total of 400 trials. There were 35 trials for each  
221 condition in which only the masker or target were modulated (70% of trials; the conditions of  
222 interest) and 15 trials for remaining conditions which were included so the subject could not  
223 infer the target modulation based on the masker modulation.

224 e. *Catch Trials*. Of the 120 trials for which either both or neither sentences were modulated, 36  
225 random trials had a small pink translucent dot over the mouth of the talker. Subjects were  
226 instructed to press 3 when they saw this dot and to not respond for pitch modulation. These  
227 catch trials ensured that subjects were looking at the talker's face. Subjects were informed each  
228 time they failed to detect the dot. The criterion to be included in the analysis was detection of  
229 more than 80% of the dots. All subjects achieved this, so all data were included in the analysis.

## 230 B. Results

231 All subjects were able to perform the pitch discrimination task well above chance (Figure 2A).  
232 There was a significant improvement in both the upright (paired t-test,  $t=6.61$ ,  $p=1.20 \times 10^{-6}$ ) and  
233 inverted (paired t-test,  $t=3.91$ ,  $p=7.49 \times 10^{-4}$ ) conditions when subjects viewed the target face relative  
234 to when they viewed the masker face (Figure 2B). However, there was no difference in the benefit  
235 due to the target face between the upright and inverted condition, and therefore no benefit of the  
236 upright face (Figure 2C). Averaging across face rotation conditions, subjects experienced a  
237 significant benefit (paired t-test,  $t=6.61$ ,  $p=1.20 \times 10^{-6}$ ) of approximately 7% when the face of the  
238 video matched the target rather than the masker.



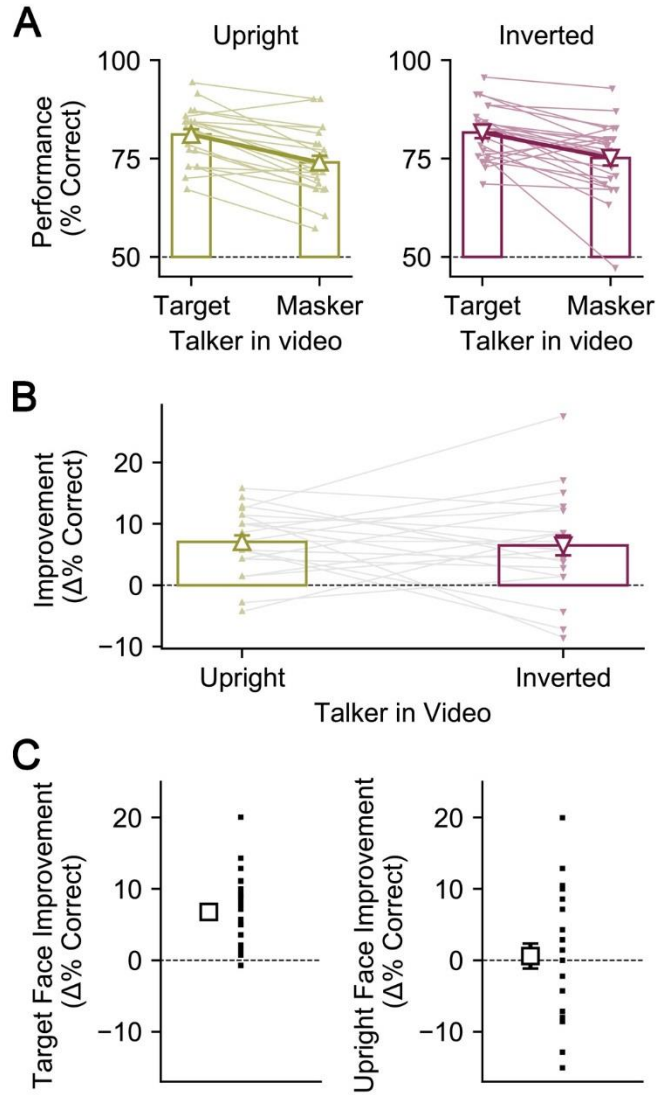

240

241 Figure 3: (Color Online). A. Performance in the pitch modulation discrimination task. Small solid  
242 markers show individual subjects, larger open markers show the average across subjects. B.  
243 The improvement in performance due to the video of the target talker's face calculated as  
244 the difference between the target visual condition and masker visual condition for a given  
245 face rotation. C. (Left) Net improvement due to the target talker's face (difference between  
246 target and masker conditions averaged across subjects and upright/inverted conditions).  
247 (Right) Net improvement due to the upright face (difference between upright and inverted  
248 conditions averaged across subjects and target/masker conditions). All error bars show  $\pm 1$   
249 SEM.

250

### 251 C. Summary

252 In Experiment II the rotation of the face did not significantly influence binding. Nonetheless  
253 this paradigm showed a strong replication of previous findings that temporal coherence induces  
254 binding (Atilgan et al., 2018; Maddox et al., 2015). The importance of temporal coherence for  
255 binding has not previously been established for speech.

## 256 IV. DISCUSSION

257 Together these experiments suggest that visual linguistic cues and audio-visual binding  
258 contribute independently to processing multimodal speech in noise. Experiment I addressed the  
259 benefit of visual linguistic cues in speech comprehension and Experiment II investigated audio-  
260 visual binding, ultimately showing that visual linguistic cues do not enhance the listener's object-  
261 based attention to the target talker.

262 In Experiment I we demonstrated that both temporal and linguistic cues are important for  
263 speech comprehension in a speech in noise task. There was a significant improvement in  
264 performance when the face was moving relative to the static image. This was true of all face rotation  
265 conditions. Because temporal cues were preserved across rotation conditions, we consider some  
266 portion of the video performance improvement to be due to temporal cues. However, as the  
267 rotation of the face increased in magnitude, the benefit of the video decreased, suggesting that some  
268 of the benefit in each condition is due to processing of linguistic cue. Though linguistic cues are  
269 present even in the rotated faces, the processing of this information seems to be impaired by  
270 rotating the face. Interestingly, performance drops with the magnitude of the rotation even though  
271 the 0° and 180° rotation are more geometrically similar due to their vertical symmetry than the 0°  
272 and 90° rotations. There are two possible explanations for this: the subject can partially compensate  
273 for the face's rotation when processing visemes or that the subject has more prior experience with  
274 90° rotated faces than with 180° rotated faces. While the latter is likely true, we do not believe it is a  
275 compelling explanation for our results. A vast majority of conversations are held with upright faces,  
276 and situations in which we are speaking to someone at a 90° rotation are minimal (e.g. talking to  
277 someone while reclined). Therefore, it seems more likely that subjects are “un-rotating” the face  
278 where possible to get some benefit from linguistic cues, and this is easier for them to do with 90°  
279 rotation than 180°.

280 In Experiment II we show that fundamental frequency modulation discrimination is improved  
281 when listeners can see the video of the target talker rather than a masker talker regardless of the  
282 orientation of the face. Structurally our experiment was very similar to previous work that tested for  
283 binding by engaging listeners in simultaneous auditory discrimination and visual detection tasks  
284 (Maddox et al., 2015). Importantly, the tasks rely on the tracking of an orthogonal perceptual feature  
285 (pitch), one that is independently changing to the feature that is coherently modulated. If the listener  
286 binds the auditory and visual streams based on their temporal coherence, their brain will form a  
287 perceptual object. By allocating object-based attention, all features of the object, including the  
288 orthogonal feature will be enhanced, leading to better performance. The performance improvement  
289 is not explained by late-stage integration since the visual stream provides no information about the  
290 orthogonal auditory features.

291 We improved upon Maddox et al's original task (2015) by using more natural stimuli. In this case  
292 the listeners had to simultaneously determine whether there was a pitch modulation in the target  
293 talker or a pink disk on the mouth in the video while ignoring the masker talker. We used real  
294 speech as the stimuli and pitch as the orthogonal feature, which gave ecological relevance to the  
295 task. Processing of pitch modulations are important in natural environments due to prosodic  
296 information that is in part carried by the pitch of a talker. This prosodic information not only  
297 provides emotional context but also is important for parsing full sentences (Stirling, 1996; Warren et  
298 al., 1995). Binding of audiovisual speech could improve our perception of not only what the talker is  
299 saying, but how they are saying it. Binding can explain an improvement in performance when the  
300 video matches the target. The listener can allocate object-based attention to the target talker and  
301 improve their discrimination of pitch modulation because detection of visual events will not divide  
302 their attention.

303        There is a consistent improvement in processing orthogonal stimulus features when the listener  
304 can see the target video, which can be explained by binding. However, the benefit is not modulated  
305 by rotating the face, suggesting that temporal coherence is the cue that underpins binding in this  
306 experiment. Using real speech, our results confirm the finding that temporal coherence drives  
307 audiovisual binding, which had been previously established for stimuli with speech-like dynamics  
308 (Maddox et al., 2015).

309        We did not find an effect of face rotation on performance in the pitch discrimination task. There  
310 are a few possible explanations for this. Temporal coherence may be sufficient to induce binding,  
311 and a possible contribution of linguistic cues would be overshadowed by the influence of temporally  
312 coherent cues. Alternatively, a contribution of linguistic cues to strengthen binding, if such a thing is  
313 possible, may have been too small to be measured behaviorally. If linguistic cues truly do not  
314 influence binding, the hierarchical processing of language therefore suggests an explanation for  
315 binding occurring independent of face rotation. While low level spectral features are well  
316 represented in A1, articulatory features are not represented until the superior temporal gyrus (STG)  
317 (Ding et al., 2016; Mesgarani et al., 2014). A study involving ferrets performing a multisensory task  
318 found neural evidence of binding in primary auditory cortex (A1) (Atilgan et al., 2018), whereas  
319 traditional Bayesian or late-stage integration is thought to occur at higher processing areas in the  
320 intraparietal sulcus (Rohe and Noppeney, 2015, 2016). Such findings support the notion that binding  
321 and late-stage integration are fundamentally different processes that rely on different types of  
322 sensory information. The extent of the visual and auditory information available at such early  
323 processing areas to create binding is uncertain, particularly given the unknown origins of the visual  
324 connections responsible for visual-dependent auditory activity in A1. In order for linguistic cues to  
325 contribute to binding the brain would need to combine feedback from STG carrying auditory  
326 articulatory information with viseme information from visual areas.

327 Together these experiments show that face-rotation and therefore disruption of linguistic cues  
328 hinders audiovisual speech comprehension, but not detection of orthogonal pitch features. Even if  
329 linguistic cues do play a role in binding, their behavioral benefit seems to be superseded by temporal  
330 coherence. Therefore, the benefit of visual linguistic cues to speech understanding is likely due to  
331 late integration in which visemes can bias the listener towards the correct phoneme perception at  
332 higher processing stages. Binding, then, may be specific to very low-level physical correspondences,  
333 a hypothesis on which future experiments will shed more light.

## 334 **V. CONCLUSION**

335 We demonstrated the importance of both temporal and linguistic visual cues for audiovisual  
336 speech in noise comprehension in an ecologically relevant task. We also showed that audiovisual  
337 temporal coherence, but not linguistic congruence, improved performance in a frequency  
338 modulation discrimination task, consistent with the existence of audiovisual binding. It thus appears  
339 that multisensory linguistic cues, an example of learned physical correspondence, are integrated at  
340 the perceptual decision-making stage rather than early integration. Practically, our results suggest that  
341 visemes can benefit listeners in noisy environments by biasing the listener towards perceiving the  
342 correct sentence, but they do not aid listeners in detecting other aspects of the talker's speech.

## 343 **ACKNOWLEDGMENTS**

344 Research reported in this publication was supported by the National Institute on Deafness and  
345 Other Communication Disorders of the National Institutes of Health under award number  
346 R00DC014288.

## 347 **REFERENCES**

348 Arnold, P., and Hill, F. (2001). "Bisensory augmentation: A speechreading advantage when speech is  
349 clearly audible and intact," *Br. J. Psychol.*, **92**, 339–355. doi:10.1348/000712601162220

- 350 Atilgan, H., Town, S. M., Wood, K. C., Jones, G. P., Maddox, R. K., Lee, A. K. C., and Bizley, J. K.  
351 (2018). “Integration of Visual Information in Auditory Cortex Promotes Auditory Scene  
352 Analysis through Multisensory Binding,” *Neuron*, **97**, 640-655.e4.  
353 doi:10.1016/j.neuron.2017.12.034
- 354 Bizley, J. K., Maddox, R. K., and Lee, A. K. C. (2016). “Defining Auditory-Visual Objects:  
355 Behavioral Tests and Physiological Mechanisms,” *Trends Neurosci.*, **39**, 74–85.  
356 doi:10.1016/j.tins.2015.12.007
- 357 Blaser, E., Pylyshyn, Z. W., and Holcombe, A. O. (2000). “Tracking an object through feature  
358 space,” *Nature*, **408**, 196-.
- 359 Boesma, P., and Weenick, D. (n.d.). *Praat: doing phonetics by computer*,
- 360 Ding, N., Melloni, L., Zhang, H., Tian, X., and Poeppel, D. (2016). “Cortical tracking of hierarchical  
361 linguistic structures in connected speech,” *Nat. Neurosci.*, **19**, 158–164. doi:10.1038/nn.4186
- 362 Grant, K. W., and Bernstein, J. G. W. (2019). “Toward a Model of Auditory-Visual Speech  
363 Intelligibility,” In A. K. C. Lee, M. T. Wallace, A. B. Coffin, A. N. Popper, and R. R. Fay  
364 (Eds.), *Multisensory Process. Audit. Perspect.*, Springer Handbook of Auditory Research,  
365 Springer International Publishing, Cham, pp. 33–57. doi:10.1007/978-3-030-10461-0\_3
- 366 Körding, K. P., Beierholm, U., Ma, W. J., Quartz, S., Tenenbaum, J. B., and Shams, L. (2007).  
367 “Causal Inference in Multisensory Perception,” *PLOS ONE*, **2**, e943.  
368 doi:10.1371/journal.pone.0000943
- 369 Lee, A. K. C., Maddox, R. K., and Bizley, J. K. (2019). “An Object-Based Interpretation of  
370 Audiovisual Processing,” In A. K. C. Lee, M. T. Wallace, A. B. Coffin, A. N. Popper, and R.  
371 R. Fay (Eds.), *Multisensory Process. Audit. Perspect.*, Springer Handbook of Auditory  
372 Research, Springer International Publishing, Cham, pp. 59–83. doi:10.1007/978-3-030-  
373 10461-0\_4

- 374 L'Engle, M. (2006). *A Wrinkle in Time*, Findaway World Llc, 238 pages.
- 375 Maddox, R. K., Atilgan, H., Bizley, J. K., and Lee, A. K. (2015). "Auditory selective attention is  
376 enhanced by a task-irrelevant temporally coherent visual stimulus in human listeners," eLife,  
377 , doi: 10.7554/eLife.04995. doi:10.7554/eLife.04995
- 378 Massaro, D. W., and Cohen, M. M. (1996). "Perceiving speech from inverted faces," *Percept.*  
379 *Psychophys.*, **58**, 1047–1065. doi:10.3758/BF03206832
- 380 Mcgurk, H., and Macdonald, J. (1976). "Hearing lips and seeing voices," *Nature*, **264**, 746–748.  
381 doi:10.1038/264746a0
- 382 Mesgarani, N., Cheung, C., Johnson, K., and Chang, E. F. (2014). "Phonetic Feature Encoding in  
383 Human Superior Temporal Gyrus," *Science*, **343**, 1006–1010. doi:10.1126/science.1245994
- 384 Reisberg, D., McLean, J., and Goldfield, A. (1987). "Easy to hear but hard to understand: A lip-  
385 reading advantage with intact auditory stimuli," *Hear. Eye Psychol. Lip-Read.*, Lawrence  
386 Erlbaum Associates, Inc, Hillsdale, NJ, US, pp. 97–113.
- 387 Rohe, T., and Noppeney, U. (2015). "Cortical Hierarchies Perform Bayesian Causal Inference in  
388 Multisensory Perception," (C. Kayser, Ed.) *PLOS Biol.*, **13**, e1002073.  
389 doi:10.1371/journal.pbio.1002073
- 390 Rohe, T., and Noppeney, U. (2016). "Distinct Computational Principles Govern Multisensory  
391 Integration in Primary Sensory and Association Cortices," *Curr. Biol.*, **26**, 509–514.  
392 doi:10.1016/j.cub.2015.12.056
- 393 Scott, M. (2008). *The Alchemyst: The Secrets of the Immortal Nicholas Flamel*, Delacorte Press, 402 pages.
- 394 Shinn-Cunningham, B. G. (2008). "Object-based auditory and visual attention," *Trends Cogn. Sci.*,  
395 **12**, 182–186. doi:10.1016/j.tics.2008.02.003



- 396 Smayda, K. E., Engen, K. J. V., Maddox, W. T., and Chandrasekaran, B. (2016). “Audio-Visual and  
397 Meaningful Semantic Context Enhancements in Older and Younger Adults,” PLOS ONE,  
398 **11**, e0152773. doi:10.1371/journal.pone.0152773
- 399 Stevenson, R. A., Zemtsov, R. K., and Wallace, M. T. (2012). “Individual Differences in the  
400 Multisensory Temporal Binding Window Predict Susceptibility to Audiovisual Illusions,” J.  
401 Exp. Psychol. Hum. Percept. Perform., **38**, 1517–1529. doi:10.1037/a0027339
- 402 *STeVi Speech Test Video Corpus* (n.d.). Sensimetrics. Retrieved from  
403 <https://www.sens.com/products/stevi-speech-test-video-corpus/>
- 404 Stirling, L. (1996). “Does Prosody Support or Direct Sentence Processing?,” Lang. Cogn. Process.,  
405 **11**, 193–212. doi:10.1080/016909696387268
- 406 Ujiie, Y., Asai, T., and Wakabayashi, A. (2018). “Individual differences and the effect of face  
407 configuration information in the McGurk effect,” Exp. Brain Res., **236**, 973–984.  
408 doi:10.1007/s00221-018-5188-4
- 409 Van Engen, K. J., Phelps, J. E. B., Smiljanic, R., and Chandrasekaran, B. (2014). “Enhancing speech  
410 intelligibility: interactions among context, modality, speech style, and masker,” J. Speech  
411 Lang. Hear. Res. JSLHR, **57**, 1908–1918. doi:10.1044/JSLHR-H-13-0076
- 412 Warren, P., Grabe, E., and Nolan, F. (1995). “Prosody, phonology and parsing in closure  
413 ambiguities,” Lang. Cogn. Process., **10**, 457–486. doi:10.1080/01690969508407112  
414
